# Supplementary material
Source: HighWire-hosted journal article supplement (https://erj.ersjournals.com/content/49/2/1601128)
Supplement: inline-supplementary-material-1 [file inline-supplementary-material-1.pdf]

# Management of CPAP treatment compliance using telemonitoring in obstructive sleep apnoea

Cecilia Turino, Jordi de Batlle, Holger Woehrle, Ana Mayoral, Anabel Castro, Sílvia Gómez, Mireia Dalmases, Manuel Sánchez-de-la-Torre, Ferran Barbé

## ONLINE SUPPLEMENT

TABLE S1 Full details of costs assessed.

|                                                                  | Cost (€)        |
|------------------------------------------------------------------|-----------------|
| <b>Direct costs</b>                                              |                 |
| Telemonitoring*                                                  |                 |
| 2G (GSM/GPRS) daily data transfer, per patient                   | 83/year         |
| Activation and maintenance of the monitoring system, per patient | 16/year         |
| Sleep unit visits <sup>#</sup>                                   | 52/visit        |
| Sleep unit consultations <sup>#</sup>                            | 41/consultation |
| CPAP's provider visits & consultations <sup>¶</sup>              | 10/contact      |
| Changes in CPAP device components <sup>¶</sup>                   |                 |
| ResMed Mirage Micro™ nasal mask                                  | 28/unit         |
| ResMed Mirage Quattro™ full face mask                            | 75/unit         |
| ResMed Mirage™ FX nasal mask                                     | 24/unit         |
| Fisher & Paykel FlexiFit™ 405 Nasal Mask                         | 32/unit         |
| ResMed AirFit™ Nasal Mask                                        | 24/unit         |
| ResMed AirFit™ F10 full face mask                                | 75/unit         |
| Philips Respironics Pico nasal mask                              | 19.5/unit       |
| Sleepnet Ascend® Nasal Mask                                      | 62/unit         |
| Sleepnet iQ® Blue Nasal masks                                    | 22/unit         |
| Phillips Respironics Profile Lite Nasal Gel Mask                 | 30/unit         |
| Phillips Respironics ComfortGel Blue Nasal Mask                  | 30/unit         |
| Apex WiZARD 220 Full Face Mask                                   | 22/unit         |
| ResMed's Chin Restraint                                          | 6/unit          |
| <b>Indirect costs</b>                                            |                 |
| Patient's travel costs to sleep unit                             | 0.19/km         |
| Patient's travel costs to CPAP's provider                        | 0.19/km         |

\* Estimated costs supplied by the CPAP provider.

<sup>#</sup> Costs based on the Catalan Institute of Health (CVE-DOGC-A-13051031-2013).

<sup>¶</sup> Commercial costs supplied by the CPAP provider.

TABLE S2 Sensitivity analyses of within-trial treatment and follow-up costs (average cost per randomised patient), considering 25% and 50% increases in CPAP provider costs.

|                                       | <b>+25% CPAP provider costs</b> |               |              | <b>+50% CPAP provider costs</b> |               |              |
|---------------------------------------|---------------------------------|---------------|--------------|---------------------------------|---------------|--------------|
|                                       | Standard Care                   | Telemedicine  | p-value*     | Standard Care                   | Telemedicine  | p-value*     |
| <b>Direct costs, €</b>                |                                 |               |              |                                 |               |              |
| Telemonitoring <sup>#</sup>           | 0                               | 29.69         | <0.001       | 0                               | 35.63         | <0.001       |
| Sleep unit visits & consultations     | 69.25                           | 6.73          | <0.001       | 69.25                           | 6.73          | <0.001       |
| CPAP provider visits & consultations  | 17.97                           | 25.48         | 0.003        | 21.56                           | 30.58         | 0.003        |
| Changes in CPAP device components     | 79.52                           | 69.13         | 0.315        | 79.52                           | 69.13         | 0.315        |
| Total                                 | 166.74                          | 131.02        | 0.067        | 170.33                          | 142.06        | 0.089        |
| <b>Indirect costs, €</b>              |                                 |               |              |                                 |               |              |
| Patient travel costs to sleep unit    | 6.49                            | 0.18          | <0.001       | 6.49                            | 0.18          | <0.001       |
| Patient travel costs to CPAP provider | 1.33                            | 3.48          | 0.027        | 1.33                            | 3.48          | 0.027        |
| Total                                 | 7.82                            | 3.66          | 0.002        | 7.82                            | 3.66          | 0.002        |
| <b>Average total cost per patient</b> | <b>174.56</b>                   | <b>134.68</b> | <b>0.048</b> | <b>178.15</b>                   | <b>145.72</b> | <b>0.116</b> |

Costs based on the Catalan Institute of Health (CVE-DOGC-A-13051031-2013), or supplied by the CPAP provider.

\*Mann-Whitney two-sample statistic.

<sup>#</sup>Including 2G (GSM/GPRS) daily data transfer and patient monitoring costs.
